# Supplementary material for: Life cycle assessment of battery cell production in the context of the EU Batteries Regulation: The influence of data aggregation and multifunctionality handling
Source: Research Square preprint supplement (doi:10.21203/rs.3.rs-8285103/v1), 2026-01-24
Supplement: Supplementary file 1 [file f1bb70e16d2d90629e41f73a.docx]

Supplementary information: Life cycle assessment of battery cell production in the context of the EU Batteries Regulation: The influence of data aggregation and multifunctionality handling

*Jana Husmann1,2*, Johanna Holsten1,2, Gabriela Ventura Silva1,2, Christoph Herrmann1,2*

1 Chair of Sustainable Manufacturing & Life Cycle Engineering, Institute of Machine Tools and Production Technology (IWF), Technische Universität Braunschweig, Langer Kamp 19b, 38106 Braunschweig, Germany

2 Battery LabFactory Braunschweig (BLB), Technische Universität Braunschweig, Langer Kamp 19, 38106 Braunschweig, Germany

*Corresponding author; mail: [j.husmann@tu-braunschweig.de](mailto:j.husmann@tu-braunschweig.de), phone: +495313912716

**Table of contents:**

1. Battery cell production simulation and calculation of environmental impacts
2. Allocation parameter
3. Benchmark with literature

References

1. **Battery cell production simulation and calculation of environmental impacts**

The simulation approach used to reproduce production operation was mainly parametrised with data gathered in the pilot line of the Battery LabFactory Braunschweig, as previously described in Turetskyy et al. and Ventura et al.1,2. Process parameters and power demands of processes limiting the process chain production were adapted to reproduce the conditions at larger production scales, including coating and drying speeds of 15 m/min 3 and laser cutting speed of 60 m/min 4.

The simulation scenario considered the production of 100 MWh battery cell capacity over the entire year of 2023 in Germany. The annual production capacity was achieved with a 24/7 production and a machine availability of 95 %. In addition, the simulation approach considered non-value-adding machine states, such as idle and break times, as presented in Ventura et al.3.

The dry room simulation proposed by Vogt et al.5 was integrated to the process chain simulation, accounting for the effects of seasonal weather factors on the dry room operation and, consequently, on the energy demand associated with battery cell production. Data on the temperature and relative humidity for the year 2023 in Braunschweig, Germany, was used as input for the simulation 6. Further considered parameters involved the heat losses from machine operation and number of workers inside the room, derived from the process chain simulation.

An overall scrap rate of 10 % was considered, which has been attributed to the process chain according to the percentages proposed by von Drachenfels et al.7, as described in Figure 1 of the publication. Further parameters related to the product (NMC pouch battery cell), such as structure and performance parameters, are presented in Table SI-1.

Table SI-1: Overview of the considered product-related (structure and performance) parameters.

| **Structure and performance parameters** | **Value** |
| --- | --- |
| Cell capacity [Wh] | 33.3 |
| Number of electrode-separator-composites [-] | 15 |
| Solids content | 0.54 |
| Nominal grammage (anode) [mg/cm²] | 8.37 |
| Density active material (anode) [g/cm³] | 2.2 |
| Density carbon black (anode) [g/cm³] | 1.8 |
| Density graphite (anode) [g/cm³] | 2.2 |
| Density binder (anode) [g/cm³] | 1.76 |
| Density solvent (anode) [g/cm³] | 1.03 |
| Formulation active material (anode) | 0.91 |
| Formulation carbon black (anode) | 0.02 |
| Formulation graphite (anode) | 0.02 |
| Formulation binder (anode) | 0.05 |
| Nominal grammage (cathode) [mg/cm²] | 16.67 |
| Density active material (cathode) [g/cm³] | 3.8 |
| Density carbonblack (cathode) [g/cm³] | 1.8 |
| Density graphite (cathode) [g/cm³] | 2.2 |
| Density binder (cathode) [g/cm³] | 1.76 |
| Density solvent (cathode) [g/cm³] | 1.03 |
| Formulation active material (cathode) | 0.9 |
| Formulation carbon black (cathode) | 0.04 |
| Formulation graphite (cathode) | 0.02 |
| Formulation binder (cathode) | 0.04 |

The simulation results were used to assess the environmental impacts of the produced cells. Due to the agent-based simulation approach, it was possible to trace the conditions under which each battery cell was produced. Therefore, the simulation results were further treated with a tool that calculates the environmental impacts of the cells while allowing different approaches to aggregate the data (temporal and spatial) and to handle the multifunctionality.

Within the simulation, the energy and material flows are assigned to the respective electrodes and cells. With the tool to calculate the environmental impacts, the material flows are linked to static impact values based on ecoinvent and current literature 8. The electricity flows are linked to dynamic impact values, which reflect the energy mix at the respective time of production of the electrodes and cell. The carbon intensity of the electricity is based on retrospective hourly data for 2023 for Germany 9 which is aggregated depending on the respective temporal resolution.

The modular structure of the calculations enables different temporal and spatial aggregations of the environmental impacts of battery cell production, e.g. the average impacts of all cells produced in one hour, day or month. As the duration of the different production processes for electrodes and cell manufacturing differs and can last over several time intervals of the respective temporal resolution, an individual dynamic average of the impacts for electricity production in this interval is calculated. Scraps are allocated (according to the respective accounting approach) based on the end of the process / process chain (e.g. for cells based on the end of the formation process). For different spatial scales, the climate change impacts of different process steps with spatial proximity are aggregated (e.g. area or factory-wise) assuming less resources are available for data collection (especially regarding the energy consumption).

Besides the temporal and spatial aggregations, the tool also allows for calculating the impacts of the battery cells while solving the multifunctionality in four different ways: i) cut-off, ii) CFF, iii) CFF PS and iv) allocation. The tool links the unallocated climate change impacts with the respective parameters for the four allocation approaches and the impacts for production scrap recycling. The parameters can be adapted based on the manufacturer's specifications (recycled content, recycling rate, recycling process).

1. **Allocation parameter**

The parameters needed for the allocation depend on the allocation approach chosen. Table SI-2 summarises the different parameters applied in this study's analysis.

Table SI-2: Parameters used for allocation approaches

| **Allocation approach** | **Parameter** | | **Value** | **Notes** |
| --- | --- | --- | --- | --- |
| **EoL Allocation** | Recycled content | NMC | 0.062 | Calculated from individual recycled contents of materials, values for lithium, nickel and cobalt based on EU Batteries Regulation. For manganese, the same value as for lithium and nickel is assumed.10 |
| Graphite | 0.06 | No value given in EU Batteries Regulation. Same value assumed as for lithium. |
| Recycling rate | Electrodes | 0.98 | Based on Lefherz et al. 11 |
| Cells | 0.717 | Based on Blömeke et al. 12 |
| **Co-product allocation** | Allocation ratio for mass-based allocation (scrap/ non-scrap) | | Electrodes: 0.003  Cells: 0.067 | The value corresponds to the scrap rates. |

1. **Benchmark with literature**

The process technologies, chemistries as well as structural and process parameters involved in battery cell production significantly influence material and energy demands. This diversity in influencing parameters leads to large variations observed in works reporting environmental impacts.

In the present work, the main source of variation was the energy demand associated with dry room operation. As the conditions within the dry room must be continuously maintained, its energy demand is independent of production throughput. Consequently, for a given dry room, specific energy demand decreases as production volume increases. The simulated scenario reproduces one year production and the modeled process chain has not been optimized to increase production throughput. Moreover, dry room dimensioning was determined based on theoretical throughput, number of required machines and their spatial requirements. Based on that, a total dry room area of 507 m² and a dew point of -60°C were assumed.

In a benchmark, the dry room energy demand and associated environmental impacts were compared with the findings of Degen et al.13, which describe a gigafactory-scale production scenario. In their study, a constant throughput of 161.39 kWh/h is assumed, with a dry room area of 960 m² operating at -40°C 13. The reported energy demand is based on average power and does not account for external factors such as weather conditions.

When normalised by area, dry room energy demands across both studies were comparable. However, differences in throughput significantly influenced specific energy demand per cell. To account for this effect, the theoretical throughput and the actual throughput inside the dry room were compared. The calculation of the theoretical throughput is based on the material flow modelling presented in Clos et al.14. The actual throughput derives from the simulation results. This comparison resulted in correction factors of 0.49 for March and 0.53 for August, reflecting variations in throughput over the year due to the dynamic nature of the simulation.

Further variations in results compared to existing literature can be attributed to differences in structural parameters and cell characteristics. For example, the amount of active material is influenced by factors such as the number of cell compartments, electrode mass loading, and formulation. Further variations derive from the separator characteristics, which are influenced by the material itself and the amount of required separator, influenced by the packaging technology (e.g., z-folding and stacking).

Besides the energy and material demands, the chosen datasets for the life cycle assessment can also have an influence on the environmental impacts. The datasets for the active materials were chosen based on recent literature8. Further material demands were modelled based on GREET and ecoinvent. The carbon intensity of the electricity mix was based on retrospective hourly data for 2023 for Germany9 which was aggregated depending on the respective temporal resolution.

**References**

1. Turetskyy A, Thiede S, Thomitzek M, von Drachenfels N, Pape T, Herrmann C. Toward Data-Driven Applications in Lithium-Ion Battery Cell Manufacturing. *Energy Technol*. 2020;8(2):1-11. doi:10.1002/ente.201900136

2. Ventura Silva G, Thomitzek M, Abraham T, Herrmann C. Bottleneck reduction strategies for energy efficiency in the battery manufacturing. *Procedia CIRP*. 2021;104:1017-1022. doi:10.1016/j.procir.2021.11.171

3. Ventura Silva G, Heckmann T, Abraham T, Scharfer P, Schabel W, Herrmann C. Model-based process design under consideration of production performance for battery cell production: A coating and drying study. *Procedia CIRP*. 2023;120:780-785. doi:10.1016/j.procir.2023.09.075

4. Luetke M, Franke V, Techel A, et al. A comparative study on cutting electrodes for batteries with lasers. *Phys Procedia*. 2011;12(PART 2):286-291. doi:10.1016/j.phpro.2011.03.135

5. Vogt M, Koch K, Turetskyy A, Cerdas F, Thiede S, Herrmann C. Model-based energy analysis of a dry room HVAC system in battery cell production. *Procedia CIRP*. 2021;98:157-162. doi:10.1016/j.procir.2021.01.023

6. Crawley D, Lawrie L. Development of Global Typical Meteorological Years. Published 2024. http://climate.onebuilding.org

7. von Drachenfels N, Husmann J, Khalid U, Cerdas F, Herrmann C. Life Cycle Assessment of the Battery Cell Production: Using a Modular Material and Energy Flow Model to Assess Product and Process Innovations. *Energy Technol*. Published online 2022. doi:10.1002/ente.202200673

8. Kallitsis E, Lindsay JJ, Chordia M, Wu B, Offer GJ, Edge JS. Think global act local: The dependency of global lithium-ion battery emissions on production location and material sources. *J Clean Prod*. 2024;449:141725. doi:10.1016/j.jclepro.2024.141725

9. Electricity Maps. Germany, 2023 Carbon Intensity Data. Published 2025. https://www.electricitymaps.com

10. European Parliament and European Council. Regulation (EU) 2023 of the European Parliament and of the Council concerning batteries and waste batteries. Published online 2023.

11. Lefherz H, Dilger N, Melzig S, Cerdas F, Zellmer S. Tighten the loop - Potential for reduction of environmental impacts by direct recycling of battery production waste. *Procedia CIRP*. 2023;116:65-70. doi:10.1016/j.procir.2023.02.012

12. Blömeke S, Scheller C, Hachenberger R, Gonter M, Herrmann C, Spengler T. Material and energy flow analysis for environmental and economic impact assessment of industrial recycling routes for lithium-ion traction batteries. *J Clean Prod*. Published online 2022.

13. Degen F, Mitterfellner M, Kampker A. Comparative life cycle assessment of lithium-ion, sodium-ion, and solid-state battery cells for electric vehicles. *J Ind Ecol*. Published online 2025:113-128. doi:10.1111/jiec.13594

14. Clos DP, Ventura Silva G, Cerdas F, Burheim OS, Herrmann C, Strømman AH. Development and validation of scalable energy models for battery cell production processes. *Energy Technol*. Published online 2025.
